# Supplementary material
Source: PubMed Central journal article supplement (PMC7686295)
Supplement: NIHMS1635991-supplement-1.pdf [file NIHMS1635991-supplement-1.pdf]

## Supplementary Figure Legends

Figure S1.

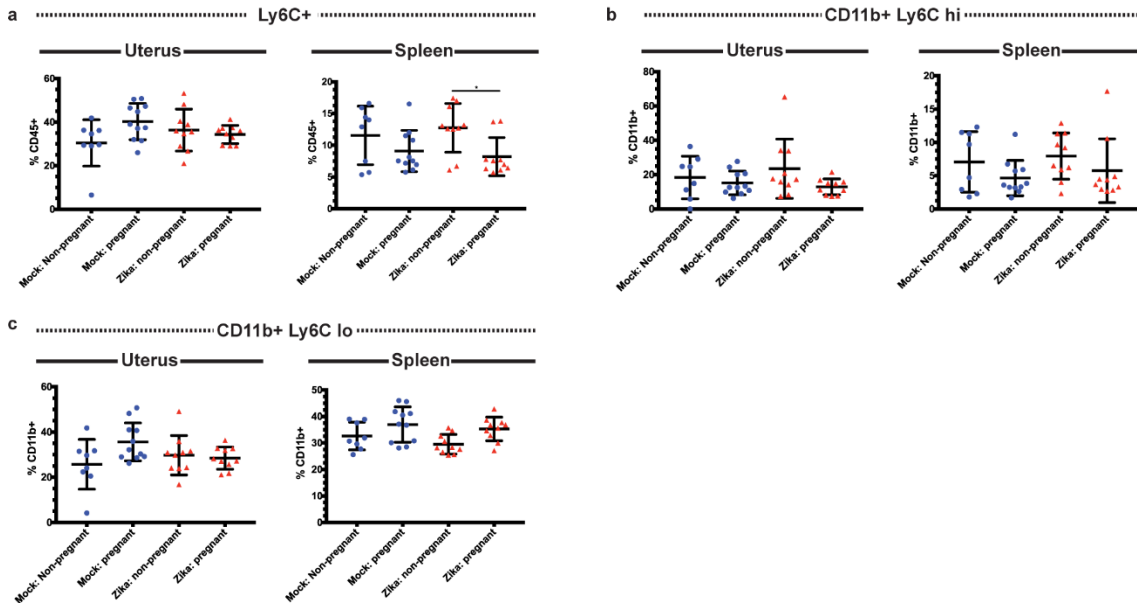

**Figure S1. Frequencies of uterine and splenic Ly6C<sup>+</sup> cells in ZIKV-infected pregnant and non-pregnant mice.** Flow cytometry was performed on immune cells from the uteruses and spleens of ZIKV-infected (red triangles) and mock-infected (blue circles) pregnant and non-pregnant mice at day 3 post infection, and the frequencies of Ly6C<sup>+</sup> (a), CD11b<sup>+</sup> Ly6C<sup>hi</sup> (b), and CD11b<sup>+</sup> Ly6C<sup>lo</sup> (c) cells were measured. \* $p < 0.05$ , one-way ANOVA and Tukey's multiple comparisons test. N=39. (2 independent experiments of 19-20 mice, N=8 mock non-pregnant, N=11 mock pregnant, N=10 ZIKV non-pregnant, N=10 ZIKV pregnant). Error bars represent the mean  $\pm$  standard deviation.

**Figure S2**

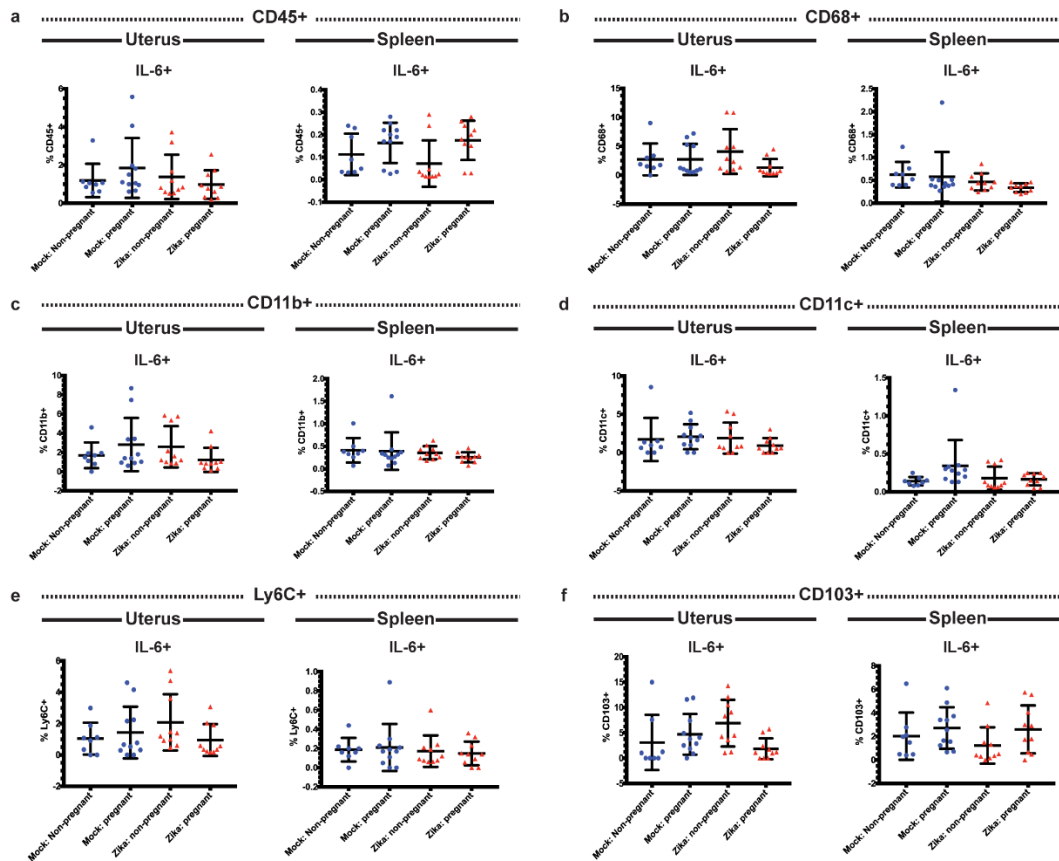

**Figure S2. IL-6 expression in the uterine and splenic immune cells of ZIKV and mock-infected mice.** Flow cytometry was performed on the uterine and splenic immune cells of ZIKV-infected (red triangles) and mock-infected (blue circles) pregnant and non-pregnant mice. Frequencies of IL-6-expressing cells were measured within the CD45+ (a), CD68+ (b), CD11b+ (c), CD11c+ (d), Ly6C+ (e), and CD103+ (f) populations. N=39. (2 independent experiments of 19-20 mice, N=8 mock non-pregnant, N=11 mock pregnant, N=10 ZIKV non-pregnant, N=10 ZIKV pregnant). Error bars represent the mean  $\pm$  standard deviation.

**Supplementary Table 1.**

| Cell Types                            | Uterus            |                       | Spleen            |                       |
|---------------------------------------|-------------------|-----------------------|-------------------|-----------------------|
|                                       | Pregnancy         | ZIKV Infection        | Pregnancy         | ZIKV Infection        |
| CD68+                                 | ↑                 | --                    | ↑ (Infected only) | --                    |
| CD11c+                                | --                | --                    | ↑ (Infected only) | --                    |
| CD11b+ CD11c+                         | ↑ (Infected only) | --                    | --                | ↑ (Pregnant only)     |
| CD11b+ CD11c+ MHCII+                  | ↑ (Infected only) | --                    | --                | --                    |
| CD11b+ CD11c+ MHCII+ IL-10+           | ↓ (Mock only)     | --                    | --                | --                    |
| CD11b+ CD11c+ CD86+                   | ↓                 | --                    | --                | --                    |
| CD11c+ CD103+                         | ↑                 | --                    | --                | --                    |
| IL-12+                                |                   |                       |                   |                       |
| CD45+ IL-12+                          | ↓ (Infected only) | --                    | ↓ (Infected only) | --                    |
| CD11b+ IL-12+                         | ↓ (Infected only) | --                    | ↓ (Infected only) | --                    |
| CD68+ IL-12+                          | ↓ (Infected only) | --                    | ↓ (Infected only) | --                    |
| Ly6C+ IL-12+                          | ↓ (Infected only) | ↑ (Non-pregnant only) | --                | --                    |
| CD8+                                  | --                | ↑ (Pregnant only)     | --                | --                    |
| CD4+ CD11a+ CD49d+                    | ↓                 | --                    | --                | ↑ (Non-pregnant only) |
| CD8 <sup>lo</sup> CD11a <sup>hi</sup> | ↓ (Infected only) | --                    | --                | ↑ (Non-pregnant only) |

**Supplementary Table 1. Summary of immune cell changes during pregnancy and ZIKV infection.**
